# Supplementary material for: Exogenous Lactogenic Signaling Stimulates Beta Cell Replication In Vivo and In Vitro
Source: MDPI journal article supplement (doi:10.3390/biom12020215), 2022-01-26
Supplement: s1 [file s1]

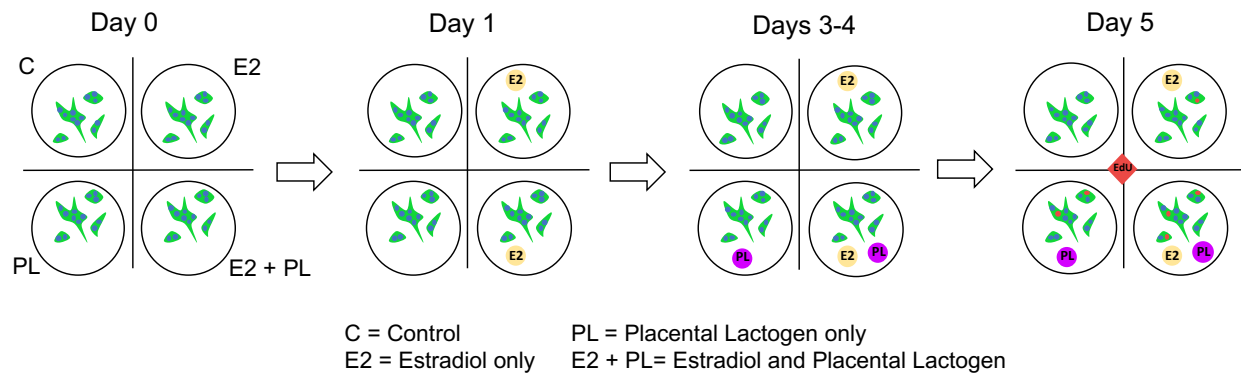

**Supplementary Figure S1.** Experimental design and nomenclature for in vitro treatment groups. Media was refreshed daily.
